# Mechanical Power: Correlate or Cause of Ventilator-induced Lung Injury?

Marcelo Gama de Abreu, M.D., M.Sc., Ph.D., DESAIC, Daniel I. Sessler, M.D.

The concept of elastic and resistive energy transfer from mechanical ventilators to the respiratory system, along with the modulation of expiratory flow as a means to reduce the energy dissipated by the lungs, was presented as conference contribution at the 2010 German Congress of Anesthesiology (Nuremberg, Germany).<sup>1</sup> About 5 yr thereafter, stress *versus* time product, a surrogate of the elastic component of mechanical power, was shown to increase gene expression of biologic markers of lung inflammation and cell injury in rats.<sup>2</sup> However, mechanical power was formally described first in 2016, along with data from swine showing that energy transferred from the ventilator to the respiratory system produces time-dependent lung injury, especially edema.<sup>3</sup> Since then, the concept of mechanical power has contributed to understanding ventilator-induced lung injury by clarifying that multiple factors combine to promote lung injury. The clinical correlate is that excessive focus on a single parameter, such as tidal volume, may be suboptimal. Furthermore, restricting individual mechanical ventilator settings to protective ranges may nonetheless provoke lung injury because several parameters might sum to potentially harmful power. On the other hand, experimental data in rats suggest that limiting mechanical power may be insufficient if a single component—for example, tidal volume—exceeds safety limits.<sup>4</sup> Thus, protective mechanical ventilation seems to require that individual components be set at safe levels *and* that their summed contribution—expressed as mechanical power—not be excessive.

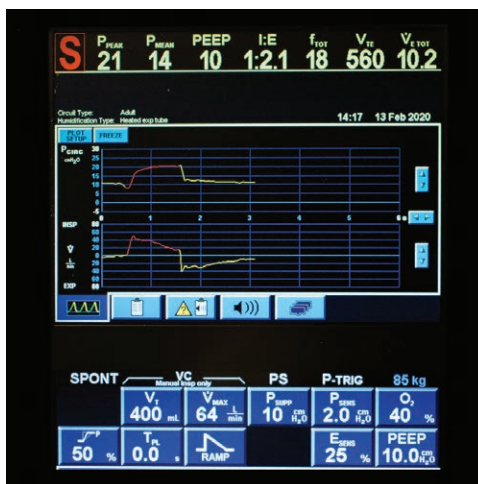

**“[In mechanical ventilation,] power may be a better marker of lung injury than isolated parameters such as tidal volume, driving pressure, or respiratory rate.”**

In this issue of *ANESTHESIOLOGY*, Santer *et al.* contribute a retrospective analysis of 230,767 adults who had elective noncardiac surgery with general anesthesia between 2008 and 2018 in two academic hospitals.<sup>5</sup> The authors found that both higher mechanical power and temporal increases of mechanical power during anesthesia were associated with postoperative respiratory failure requiring intubation. These findings advance our understanding of ventilator-induced lung injury, and are generally consistent with critical care studies suggesting that mechanical power is associated with adverse outcomes, including death.<sup>6</sup>

Santer *et al.*<sup>5</sup> used an equation developed 2021 for epidemiologic studies,<sup>7</sup> which includes three basic terms. One term expresses a “static” component—that is, the contribution of positive end-expiratory pressure (PEEP) or stored energy. The second term reflects the energy needed to overcome resistance to airflow. The third term describes the energy dissipated to expand the lungs, thus representing the elastic component of lung expansion. The three terms are summed and divided by time to yield power, usually in units of joules per minute.

PEEP is among the terms in the mechanical power equation Santer *et al.* used, but PEEP does not contribute to movement of air, and therefore does not directly augment mechanical power, as shown recently in a theoretical essay.<sup>8</sup> There are, nonetheless, at least two mechanisms by which PEEP can injure lungs. First, it increases energy stored in the lungs, although the contribution of stored

Image: J. P. Rathmell.

This editorial accompanies the article on p. 41. This article has an audio podcast.

Accepted for publication April 8, 2022. Published online first on May 13, 2022.

Marcelo Gama de Abreu, M.D., M.Sc., Ph.D., DESAIC, Department of Intensive Care and Resuscitation, Anesthesiology Institute, Cleveland Clinic, Cleveland, Ohio; Department of Outcomes Research, Anesthesiology Institute, Cleveland Clinic, Cleveland, Ohio.

Daniel I. Sessler, M.D.: Department of Outcomes Research, Anesthesiology Institute, Cleveland Clinic, Cleveland, Ohio.

Copyright © 2022, the American Society of Anesthesiologists. All Rights Reserved. *Anesthesiology* 2022; 137:6–8. DOI: 10.1097/ALN.0000000000004240

energy to lung injury remains poorly characterized. Second, PEEP influences the amplitude of tidal volume and driving pressure depending on the elastic properties of the respiratory system. Thus, the existence of a “static component” of mechanical power is questionable.

The resistive component of mechanical power results when airways impede air movement. The resistive contribution to ventilator-induced lung injury has also been questioned because laboratory findings suggest that lung inflammation during mechanical ventilation better correlates with the elastic than resistive component of mechanical power.<sup>9</sup> Nonetheless, flow impedance can be substantial when lungs are stiff, given consequent high pressures and high peak flow, especially at the beginning of the expiratory phase. It therefore seems likely that contribution of the resistive contribution to lung injury varies depending on underlying pulmonary pathology.

In the study by Santer *et al.*,<sup>5</sup> the association of mechanical power with respiratory failure and intubation remained after adjustment for various ventilatory variables, suggesting that power may be a better marker of lung injury than isolated parameters such as tidal volume, driving pressure, or respiratory rate. The elastic component was the only term in the equation for mechanical power that was individually significantly associated with outcome, leading the authors to conclude that is the most informative component of mechanical power. However, the point estimates for the contributions of each component were similar, ranging from 1.23 to 1.35 odds, suggesting that the contributions of elastic, resistive, and static components are in fact roughly comparable.

Santer *et al.*<sup>5</sup> convincingly confirm their primary hypothesis that mechanical power is associated with lung injury. Associations can be valuable because they help clinicians anticipate events, but it is also worth considering that the difference in primary outcome between the lowest and highest quintiles was 1.1 minus 0.7% = 0.4%, which corresponds to a number needed to treat of 250 even assuming that patients can be moved across so many quintiles, which seems unlikely since power is probably mostly determined by individual patient need. Furthermore, the range of mechanical power exposure was narrow, and most patients received a very reasonable set of ventilator parameters. As a result, the quintiles did not differ markedly.

Santer *et al.*<sup>5</sup> also report that intraoperative increases in mechanical power predict respiratory failure, but this finding resulted from exploratory analyses that were not adjusted for multiple testing. During a case, clinicians do not normally augment ventilation settings unless this is necessary to maintain adequate ventilation. It thus seems unlikely that the observed increase in power is a causal mechanism for respiratory failure. Importantly, there were substantial differences between the reintubation and reference groups, including, for example, American Society of Anesthesiologists (Schaumburg, Illinois) Physical Status

(III *vs.* II), age (9 yr older), much more vascular surgery, more hypotension and vasopressor use, and a threefold greater Charlson comorbidity index. The authors adjusted for all these factors, but there were presumably other important factors that remain as unobserved confounding. Thus, while the association between increasing intraoperative power and respiratory failure is presumably accurate, it probably is not amenable to intervention and instead represents progressive lung failure.

As with all observational research, it remains unknown whether mechanical power is merely a marker of lung injury, or its cause. For example, high mechanical power may merely identify lungs that are already injured for reasons unrelated to mechanical ventilation such as obstructive disease or various comorbidities, or are worsening during anesthesia because of fluid overload or inflammation. Such subtle confounding is difficult or impossible to extract retrospectively from clinical records. The distinction between prediction and causality is crucial because interventions to reduce mechanical power will improve outcomes only if the relationship is causal. For example, observational associations between low intraoperative tidal volumes and moderate PEEP and improved clinical outcomes<sup>10,11</sup> have not been confirmed in randomized trials.<sup>12–14</sup>

Designing randomized trials of mechanical power will be nontrivial. For example, various ventilator settings can yield the same mechanical power, and safe thresholds are poorly defined. Furthermore, the regional concentration of mechanical power—*intensity*—can differ depending on the lung conditions and structure. Trials of mechanical power are nonetheless needed to determine if the associations identified in observational analyses are causal, and thus amenable to intervention.

## Competing Interests

Dr. Gama de Abreu received consultation fees from Ambu (Ballerup, Denmark), Lungpacer Medical Inc. (Vancouver, Canada), and ZOLL (Rochester, Minnesota). Dr Sessler is not supported by, nor maintains any financial interest in, any commercial activity that may be associated with the topic of this article.

## Correspondence

Address correspondence to Dr. Sessler: ds@or.org

## References

1. Guttman J: Energietransfer Beatmungsger t-Patient - Kann man das weiter minimieren? German Congress of Anesthesiology, Anästh Intensivmed 2010; 51:S527
2. Spieth PM, Silva PL, Garcia CS, Ornellas DS, Samary CS, Moraes L, Bentes M, Morales MM, Kasper M, Güldner A, Huhle R, Koch T, Pelosi P, de Abreu MG,

- Rocco PR: Modulation of stress *versus* time product during mechanical ventilation influences inflammation as well as alveolar epithelial and endothelial response in rats. *ANESTHESIOLOGY* 2015; 122:106–16
3. Cressoni M, Gotti M, Chiurazzi C, Massari D, Algieri I, Amini M, Cammaroto A, Brioni M, Montaruli C, Nikolla K: Mechanical power and development of ventilator-induced lung injury. *ANESTHESIOLOGY* 2016; 124:1100–8
  4. Santos RS, Maia LA, Oliveira MV, Santos CL, Moraes L, Pinto EF, Samary CDS, Machado JA, Carvalho AC, Fernandes MVS, Martins V, Capelozzi VL, Morales MM, Koch T, Gama de Abreu M, Pelosi P, Silva PL, Rocco PRM: Biologic impact of mechanical power at high and low tidal volumes in experimental mild acute respiratory distress syndrome. *ANESTHESIOLOGY* 2018; 128:1193–206
  5. Santer P, Wachtendorf LJ, Suleiman A, Houle TT, Fassbender P, Costa EL, Talmor D, Eikermann M, Baedorf-Kassis E, Schaefer MS: Mechanical power during general anesthesia and postoperative respiratory failure: A multicenter retrospective cohort study. *ANESTHESIOLOGY* 2022; 137:41–54
  6. Serpa Neto A, Deliberato RO, Johnson AEW, Bos LD, Amorim P, Pereira SM, Cazati DC, Cordioli RL, Correa TD, Pollard TJ, Schettino GPP, Timenetsky KT, Celi LA, Pelosi P, Gama de Abreu M, Schultz MJ; PROVE Network Investigators: Mechanical power of ventilation is associated with mortality in critically ill patients: An analysis of patients in two observational cohorts. *Intensive Care Med* 2018; 44:1914–22
  7. Costa ELV, Slutsky AS, Brochard LJ, Brower R, Serpa-Neto A, Cavalcanti AB, Mercat A, Meade M, Morais CCA, Goligher E, Carvalho CRR, Amato MBP: Ventilatory variables and mechanical power in patients with acute respiratory distress syndrome. *Am J Respir Crit Care Med* 2021; 204:303–11
  8. Huhle R, Serpa Neto A, Schultz MJ, Gama de Abreu M: Is mechanical power the final word on ventilator-induced lung injury?—No. *Ann Transl Med* 2018; 6:394
  9. Scharffenberg M, Wittenstein J, Ran X, Zhang Y, Braune A, Theilen R, Maiello L, Benzi G, Bluth T, Kiss T, Pelosi P, Rocco PRM, Schultz MJ, Kotzerke J, Gama de Abreu M, Huhle R: Mechanical power correlates with lung inflammation assessed by positron-emission tomography in experimental acute lung injury in pigs. *Front Physiol* 2021; 12:717266
  10. Serpa Neto A, Hemmes SN, Barbas CS, Beiderlinden M, Fernandez-Bustamante A, Futier E, Hollmann MW, Jaber S, Kozian A, Licker M, Lin WQ, Moine P, Scavonetto F, Schilling T, Selmo G, Severgnini P, Sprung J, Treschan T, Unzueta C, Weingarten TN, Wolthuis EK, Wrigge H, Gama de Abreu M, Pelosi P, Schultz MJ; PROVE Network Investigators: Incidence of mortality and morbidity related to postoperative lung injury in patients who have undergone abdominal or thoracic surgery: A systematic review and meta-analysis. *Lancet Respir Med* 2014; 2:1007–15
  11. Ball L, Hemmes SNT, Serpa Neto A, Bluth T, Canet J, Hiesmayr M, Hollmann MW, Mills GH, Vidal Melo MF, Putensen C, Schmid W, Severgnini P, Wrigge H, Gama de Abreu M, Schultz MJ, Pelosi P; LAS VEGAS Investigators; PROVE Network; Clinical Trial Network of the European Society of Anaesthesiology: Intraoperative ventilation settings and their associations with postoperative pulmonary complications in obese patients. *Br J Anaesth* 2018; 121:899–908
  12. PROVE Network Investigators for the Clinical Trial Network of the European Society of Anaesthesiology: High versus low positive end-expiratory pressure during general anaesthesia for open abdominal surgery (PROVHILO trial): A multicentre randomised controlled trial. *Lancet* 2014; 384: 495–503
  13. Writing Committee for the PROBESE Collaborative Group of the PROtective VEntilation Network (PROVENet) for the Clinical Trial Network of the European Society of Anaesthesiology, Bluth T, Serpa Neto A, Schultz MJ, Pelosi P, Gama de Abreu M: Effect of intraoperative high positive end-expiratory pressure (PEEP) with recruitment maneuvers vs low PEEP on postoperative pulmonary complications in obese patients: A randomized clinical trial. *JAMA* 2019; 321:2292–305
  14. Karalapillai D, Weinberg L, Peyton P, Ellard L, Hu R, Pearce B, Tan CO, Story D, O'Donnell M, Hamilton P, Oughton C, Galtieri J, Wilson A, Serpa Neto A, Eastwood G, Bellomo R, Jones DA: Effect of intraoperative low tidal volume vs conventional tidal volume on postoperative pulmonary complications in patients undergoing major surgery: A randomized clinical trial. *JAMA* 2020; 324:848–58
